# Supplementary material
Source: HighWire-hosted journal article supplement (http://rc.rcjournal.com/highwire/filestream/16029/field_highwire_adjunct_files/0/suppl.pdf)
Supplement: suppl.pdf [file suppl.pdf]

**Appendix A. Candidate Variables Included in the Model Building.**

| Appendix A                | Risk Factors | N (%) or Mean (SD)    | Readmitted within 30 Days | Not Readmitted within 30 Days | p-value |
|---------------------------|--------------|-----------------------|---------------------------|-------------------------------|---------|
|                           |              |                       | 330 (25%)                 | 965 (75%)                     |         |
|                           |              | N (%) or Mean (SD)    | N (%) or Mean (SD)        | N (%) or Mean (SD)            |         |
| Age                       |              | 62.83 (16.53)         | 65.62 (15.60)             | 61.88 (16.73)                 | 0.0004  |
| Length of Hospitalization |              | 5.9 (5.97)            | 7.23 (8.02)               | 5.50 (2.02)                   | <0.0001 |
| Discharge Status          |              |                       |                           |                               | <0.0001 |
| Home                      |              | 837 (65%)             | 171 (52%)                 | 666 (69%)                     |         |
| Home with Care            |              | 202 (16%)             | 65 (20%)                  | 137 (14%)                     |         |
| LTACH/Rehab               |              | 35 (3%)               | 16 (5%)                   | 19 (2%)                       |         |
| SNF                       |              | 191 (15%)             | 70 (21%)                  | 121 (13%)                     |         |
| Other                     |              | 29 (2%)               | 8 (2%)                    | 21 (2%)                       |         |
| Missing                   |              | 1 (0%)                |                           |                               |         |
| Gender                    |              |                       |                           |                               | 0.6704  |
| Male                      |              | 676 (52%)             | 176 (54%)                 | 500 (52%)                     |         |
| Female                    |              | 612 (48%)             | 153 (46%)                 | 459 (48%)                     |         |
| Missing                   |              | 7 (0%)                |                           |                               |         |
| Race                      |              |                       |                           |                               | 0.7692  |
| Caucasian                 |              | 782 (60%)             | 195 (61%)                 | 587 (62%)                     |         |
| African American          |              | 451 (35%)             | 118 (37%)                 | 333 (35%)                     |         |
| Other                     |              | 33 (3%)               | 7 (2%)                    | 26 (3%)                       |         |
| Missing                   |              | 29 (2%)               |                           |                               |         |
| Smoking Status            |              |                       |                           |                               | 0.1195  |
| Current                   |              | 132 (10%)             | 28 (11%)                  | 104 (17%)                     |         |
| Former                    |              | 437 (34%)             | 132 (52%)                 | 305 (48%)                     |         |
| Never                     |              | 310 (24%)             | 92 (37%)                  | 218 (35%)                     |         |
| Missing                   |              | 416 (32%)             |                           |                               |         |
| Income                    |              | 46,360<br>(19,105.59) | 47,146.59<br>(19,797.18)  | 46,090.93<br>(18,864.05)      | 0.4511  |
| Missing                   |              | 33 (3%)               |                           |                               |         |
| Alcohol Abuse             |              |                       |                           |                               | 0.7365  |
| Yes                       |              | 51 (4%)               | 12 (4%)                   | 39 (4%)                       |         |
| No                        |              | 1237 (96%)            | 317 (96%)                 | 920 (96%)                     |         |
| Missing                   |              | 7 (0%)                |                           |                               |         |
| Anxiety                   |              |                       |                           |                               | 0.8501  |
| Yes                       |              | 246 (19%)             | 64 (20%)                  | 182 (19%)                     |         |
| No                        |              | 1042 (81%)            | 265 (80%)                 | 777 (81%)                     |         |
| Missing                   |              | 7 (0%)                |                           |                               |         |
| Asthma                    |              |                       |                           |                               | 0.2587  |
| Yes                       |              | 275 (21%)             | 63 (19%)                  | 212 (22%)                     |         |

|                           |         |            |           |           |        |
|---------------------------|---------|------------|-----------|-----------|--------|
| Bronchiectasis            | No      | 1013 (79%) | 266 (81%) | 747 (78%) | 0.0342 |
|                           | Missing | 7 (0%)     |           |           |        |
|                           | Yes     | 59 (5%)    | 22 (7%)   | 37 (4%)   |        |
| Cancer                    | No      | 1229 (95%) | 307 (93%) | 922 (96%) | 0.0011 |
|                           | Missing | 7 (0%)     |           |           |        |
|                           | Yes     | 644 (50%)  | 190 (58%) | 454 (47%) |        |
| Coronary Heart Disease    | No      | 644 (50%)  | 139 (42%) | 505 (53%) | 0.0002 |
|                           | Missing | 7 (0%)     |           |           |        |
|                           | Yes     | 412 (32%)  | 132 (40%) | 280 (29%) |        |
| Heart Failure             | No      | 876 (68%)  | 197 (60%) | 679 (71%) | 0.0011 |
|                           | Missing | 7 (0%)     |           |           |        |
|                           | Yes     | 357 (28%)  | 114 (35%) | 243 (25%) |        |
| Cirrhosis                 | No      | 931 (72%)  | 215 (65%) | 716 (75%) | 0.6828 |
|                           | Missing | 7 (0%)     |           |           |        |
|                           | Yes     | 56 (4%)    | 13 (4%)   | 43 (5%)   |        |
| Chronic Kidney Disease    | No      | 1232 (96%) | 316 (96%) | 916 (95%) | 0.001  |
|                           | Missing | 7 (0%)     |           |           |        |
|                           | Yes     | 302 (23%)  | 99 (30%)  | 203 (21%) |        |
| Connective Tissue Disease | No      | 986 (77%)  | 230 (70%) | 756 (79%) | 0.8275 |
|                           | Missing | 7 (0%)     |           |           |        |
|                           | Yes     | 56 (4%)    | 15 (5%)   | 41 (4%)   |        |
| COPD                      | No      | 1232 (96%) | 314 (95%) | 918 (96%) | 0.2799 |
|                           | Missing | 7 (0%)     |           |           |        |
|                           | Yes     | 400 (31%)  | 110 (33%) | 290 (30%) |        |
| Dementia                  | No      | 888 (69%)  | 219 (67%) | 669 (70%) | 0.8159 |
|                           | Missing | 7 (0%)     |           |           |        |
|                           | Yes     | 52 (4%)    | 14 (4%)   | 38 (4%)   |        |
| Depression                | No      | 1236 (96%) | 315 (96%) | 921 (96%) | 0.3783 |
|                           | Missing | 7 (0%)     |           |           |        |
|                           | Yes     | 171 (13%)  | 39 (12%)  | 132 (14%) |        |
| Diabetes                  | No      | 1117 (87%) | 290 (88%) | 827 (86%) |        |
|                           | Missing | 7 (0%)     |           |           |        |
|                           | Yes     |            |           |           |        |

|                              |         |            |           |           |        |
|------------------------------|---------|------------|-----------|-----------|--------|
|                              | Yes     | 454 (35%)  | 134 (41%) | 320 (33%) | 0.0159 |
|                              | No      | 834 (65%)  | 195 (59%) | 639 (67%) |        |
|                              | Missing | 7 (0%)     |           |           |        |
| Diaphragm Paralysis          |         |            |           |           |        |
|                              | Yes     | 17 (1%)    | 3 (1%)    | 14 (2%)   | 0.4523 |
|                              | No      | 1271 (99%) | 326 (99%) | 945 (98%) |        |
|                              | Missing | 7 (0%)     |           |           |        |
| Empyema                      |         |            |           |           |        |
|                              | Yes     | 25 (2%)    | 10 (3%)   | 15 (2%)   | 0.0942 |
|                              | No      | 1263 (98%) | 319 (97%) | 944 (98%) |        |
|                              | Missing | 7 (0%)     |           |           |        |
| End Stage Renal Disease      |         |            |           |           |        |
|                              | Yes     | 121 (9%)   | 41 (12%)  | 80 (8%)   | 0.0271 |
|                              | No      | 1167 (91%) | 288 (88%) | 879 (92%) |        |
|                              | Missing | 7 (0%)     |           |           |        |
| Hip Fracture                 |         |            |           |           |        |
|                              | Yes     | 29 (2%)    | 10 (3%)   | 19 (2%)   | 0.2642 |
|                              | No      | 1259 (98%) | 319 (97%) | 940 (98%) |        |
|                              | Missing | 7 (0%)     |           |           |        |
| Interstitial Lung Disease    |         |            |           |           |        |
|                              | Yes     | 204 (16%)  | 53 (16%)  | 151 (16%) | 0.8761 |
|                              | No      | 1084 (84%) | 276 (84%) | 808 (84%) |        |
|                              | Missing | 7 (0%)     |           |           |        |
| Other Neurological Disorders |         |            |           |           |        |
|                              | Yes     | 99 (8%)    | 29 (9%)   | 70 (7%)   | 0.3733 |
|                              | No      | 1189 (92%) | 300 (91%) | 889 (93%) |        |
|                              | Missing | 7 (0%)     |           |           |        |
| Peptic Ulcer                 |         |            |           |           |        |
|                              | Yes     | 82 (6%)    | 23 (7%)   | 59 (6%)   | 0.5909 |
|                              | No      | 1206 (94%) | 306 (93%) | 900 (94%) |        |
|                              | Missing | 7 (0%)     |           |           |        |
| Pleural Effusion             |         |            |           |           |        |
|                              | Yes     | 203 (16%)  | 57 (17%)  | 146 (15%) | 0.3668 |
|                              | No      | 1085 (84%) | 272 (83%) | 813 (85%) |        |
|                              | Missing | 7 (0%)     |           |           |        |
| Sleep Apnea                  |         |            |           |           |        |
|                              | Yes     | 133 (10%)  | 37 (11%)  | 96 (10%)  | 0.525  |
|                              | No      | 1155 (90%) | 292 (89%) | 863 (90%) |        |
|                              | Missing | 7 (0%)     |           |           |        |
| Stroke                       |         |            |           |           |        |
|                              | Yes     | 277 (22%)  | 79 (24%)  | 198 (21%) | 0.1998 |
|                              | No      | 1011 (78%) | 250 (76%) | 761 (79%) |        |
|                              | Missing | 7 (0%)     |           |           |        |

|                                             |         |                    |                      |                     |        |
|---------------------------------------------|---------|--------------------|----------------------|---------------------|--------|
| Altered Mental Status                       |         |                    |                      |                     |        |
|                                             | Yes     | 68 (5%)            | 23 (7%)              | 45 (5%)             | 0.1077 |
|                                             | No      | 1220 (95%)         | 306 (93%)            | 914 (95%)           |        |
|                                             | Missing | 7 (0%)             |                      |                     |        |
| Previous Hospitalization for Pneumonia      |         |                    |                      |                     |        |
|                                             | Yes     | 620 (48%)          | 173 (53%)            | 447 (47%)           | 0.0614 |
|                                             | No      | 668 (52%)          | 156 (47%)            | 512 (53%)           |        |
|                                             | Missing | 7 (0%)             |                      |                     |        |
| Organ Transplantation                       |         |                    |                      |                     |        |
|                                             | Heart   | 22 (2%)            | 9 (3%)               | 13 (1%)             | 0.4583 |
|                                             | Kidney  | 54 (4%)            | 11 (3%)              | 43 (4%)             |        |
|                                             | Liver   | 22 (2%)            | 7 (2%)               | 15 (2%)             |        |
|                                             | Lung    | 26 (2%)            | 5 (1%)               | 21 (2%)             |        |
|                                             | Other   | 65 (5%)            | 18 (6%)              | 47 (5%)             |        |
|                                             | None    | 1099 (85%)         | 279 (85%)            | 820 (86%)           |        |
| Inotropes Given During Hospitalization      |         |                    |                      |                     |        |
|                                             | Yes     | 169 (13%)          | 58 (18%)             | 111 (12%)           | 0.0048 |
|                                             | No      | 1113 (86%)         | 269 (82%)            | 844 (88%)           |        |
|                                             | Missing | 13 (1%)            |                      |                     |        |
| Time until First Administered Antibiotics   |         | 1034.0<br>(859.95) | 1117.84<br>(1049.01) | 1005.01<br>(783.10) | 0.097  |
| Aspirin                                     |         |                    |                      |                     |        |
|                                             | Yes     | 439 (34%)          | 108 (33%)            | 331 (35%)           | 0.5742 |
|                                             | No      | 837 (65%)          | 218 (67%)            | 619 (65%)           |        |
|                                             | Missing | 19 (1%)            |                      |                     |        |
| Plavix Prescribed at Discharge              |         |                    |                      |                     |        |
|                                             | Yes     | 82 (6%)            | 23 (7%)              | 59 (72%)            | 0.5915 |
|                                             | No      | 1194 (93%)         | 303 (93%)            | 891 (94%)           |        |
|                                             | Missing | 19 (1%)            |                      |                     |        |
| Coumadin Prescribed at Discharge            |         |                    |                      |                     |        |
|                                             | Yes     | 164 (13%)          | 61 (19%)             | 103 (11%)           | 0.0002 |
|                                             | No      | 1112 (86%)         | 265 (81%)            | 847 (89%)           |        |
|                                             | Missing | 19 (1%)            |                      |                     |        |
| Sulfonylureas Prescribed at Discharge       |         |                    |                      |                     |        |
|                                             | Yes     | 36 (3%)            | 7 (2%)               | 29 (3%)             | 0.3943 |
|                                             | No      | 1240 (96%)         | 319 (98%)            | 921 (97%)           |        |
|                                             | Missing | 19 (1%)            |                      |                     |        |
| Long acting insulin Prescribed at Discharge |         |                    |                      |                     |        |
|                                             | Yes     | 340 (27%)          | 102 (31%)            | 238 (25%)           | 0.028  |
|                                             | No      | 936 (72%)          | 224 (69%)            | 712 (75%)           |        |
|                                             | Missing | 19 (1%)            |                      |                     |        |
| DPP4 Prescribed at Discharge                |         |                    |                      |                     |        |
|                                             | Yes     | 17 (1%)            | 5 (1%)               | 12 (1%)             | 0.7131 |

|                                                           |         |            |           |           |         |
|-----------------------------------------------------------|---------|------------|-----------|-----------|---------|
|                                                           | No      | 1259 (98%) | 321 (99%) | 938 (99%) |         |
|                                                           | Missing | 19 (1%)    |           |           |         |
| Oral Steroids Prescribed at Discharge                     |         |            |           |           |         |
|                                                           | Yes     | 488 (38%)  | 139 (43%) | 349 (37%) | 0.0585  |
|                                                           | No      | 788 (61%)  | 187 (57%) | 601 (63%) |         |
|                                                           | Missing | 19 (1%)    |           |           |         |
| Inhaled Short-acting Beta-agonist Prescribed at Discharge |         |            |           |           |         |
|                                                           | Yes     | 825 (64%)  | 209 (64%) | 616 (65%) | 0.8115  |
|                                                           | No      | 451 (35%)  | 117 (36%) | 334 (35%) |         |
|                                                           | Missing | 19 (1%)    |           |           |         |
| Inhaled Steroids Prescribed at Discharge                  |         |            |           |           |         |
|                                                           | Yes     | 309 (24%)  | 72 (22%)  | 237 (25%) | 0.298   |
|                                                           | No      | 967 (75%)  | 254 (78%) | 713 (75%) |         |
|                                                           | Missing | 19 (1%)    |           |           |         |
| Inhaled Anticholinergics Prescribed at Discharge          |         |            |           |           |         |
|                                                           | Yes     | 529 (41%)  | 136 (42%) | 393 (41%) | 0.912   |
|                                                           | No      | 747 (58%)  | 190 (58%) | 557 (59%) |         |
|                                                           | Missing | 19 (1%)    |           |           |         |
| Inhaled Long-acting Beta-agonist Prescribed at Discharge  |         |            |           |           |         |
|                                                           | Yes     | 179 (14%)  | 40 (12%)  | 139 (15%) | 0.2894  |
|                                                           | No      | 1097 (85%) | 286 (88%) | 811 (85%) |         |
|                                                           | Missing | 19 (1%)    |           |           |         |
| Benzodiazepine Prescribed at Discharge                    |         |            |           |           |         |
|                                                           | Yes     | 359 (28%)  | 109 (33%) | 250 (26%) | 0.0136  |
|                                                           | No      | 917 (71%)  | 217 (67%) | 700 (74%) |         |
|                                                           | Missing | 19 (1%)    |           |           |         |
| Antibiotic Prescribed at Discharge                        |         |            |           |           |         |
|                                                           | Yes     | 1244 (96%) | 319 (98%) | 925 (97%) | 0.6294  |
|                                                           | No      | 32 (3%)    | 7 (2%)    | 25 (3%)   |         |
|                                                           | Missing | 19 (1%)    |           |           |         |
| Antiarrhythmic Prescribed at Discharge                    |         |            |           |           |         |
|                                                           | Yes     | 152 (12%)  | 48 (15%)  | 104 (11%) | 0.0693  |
|                                                           | No      | 1124 (87%) | 278 (85%) | 846 (89%) |         |
|                                                           | Missing | 19 (1%)    |           |           |         |
| Lasix Prescribed at Discharge                             |         |            |           |           |         |
|                                                           | Yes     | 431 (34%)  | 129 (40%) | 302 (32%) | 0.0104  |
|                                                           | No      | 845 (65%)  | 197 (60%) | 648 (68%) |         |
|                                                           | Missing | 19 (1%)    |           |           |         |
| Opioids Prescribed at Discharge                           |         |            |           |           |         |
|                                                           | Yes     | 755 (58%)  | 225 (69%) | 530 (56%) | <0.0001 |
|                                                           | No      | 521 (41%)  | 101 (31%) | 420 (44%) |         |

|                                                    |               |               |                |                |        |
|----------------------------------------------------|---------------|---------------|----------------|----------------|--------|
|                                                    | Missing       | 19 (1%)       |                |                |        |
| Mode of O <sub>2</sub> Delivery on Admission       |               |               |                |                |        |
|                                                    | Nasal Cannula | 499 (39%)     | 134 (41%)      | 365 (38%)      | 0.2184 |
|                                                    | Room Air      | 675 (52%)     | 159 (49%)      | 516 (54%)      |        |
|                                                    | Ventilator    | 43 (3%)       | 14 (4%)        | 29 (3%)        |        |
|                                                    | Other         | 62 (5%)       | 20 (6%)        | 42 (5%)        |        |
|                                                    | Missing       | 16 (1%)       |                |                |        |
| Mode of O <sub>2</sub> Delivery on Discharge       |               |               |                |                |        |
|                                                    | Nasal Cannula | 420 (33%)     | 131 (40%)      | 289 (31%)      | 0.0004 |
|                                                    | Room Air      | 832 (64%)     | 184 (56%)      | 648 (68%)      |        |
|                                                    | Ventilator    | 21 (2%)       | 10 (3%)        | 11 (1%)        |        |
|                                                    | Other         | 6 (0%)        | 2 (1%)         | 4 (0%)         |        |
|                                                    | Missing       | 16 (1%)       |                |                |        |
| Min FiO <sub>2</sub> within First 24 Hours         |               | 25.15 (7.65)  | 25.90 (7.06)   | 24.90 (7.82)   | 0.0002 |
|                                                    | Missing       | 50 (4%)       |                |                |        |
| Max FiO <sub>2</sub> within First 24 Hours         |               | 34.60 (16.62) | 35.77 (17.37)  | 34.20 (16.35)  | 0.083  |
|                                                    | Missing       | 50 (4%)       |                |                |        |
| Min FiO <sub>2</sub> within Last 24 Hours          |               | 23.56 (5.14)  | 24.28 (5.99)   | 23.31 (4.79)   | 0.0044 |
|                                                    | Missing       | 27 (2%)       |                |                |        |
| Max FiO <sub>2</sub> within Last 24 Hours          |               | 27.27 (8.17)  | 27.87 (7.96)   | 27.07 (8.24)   | 0.0253 |
|                                                    | Missing       | 27 (2%)       |                |                |        |
| Min Systolic Blood Pressure within First 24 Hours  |               | 107.4 (18.34) | 107.34 (18.77) | 107.41 (18.20) | 0.9656 |
|                                                    | Missing       | 89 (7%)       |                |                |        |
| Max Systolic Blood Pressure within First 24 Hours  |               | 147.1 (24.77) | 146.22 (25.22) | 147.39 (24.63) | 0.2883 |
|                                                    | Missing       | 89 (7%)       |                |                |        |
| Min Systolic Blood Pressure within Last 24 Hours   |               | 112.6 (16.68) | 112.41 (15.00) | 112.69 (17.21) | 0.9148 |
|                                                    | Missing       | 32 (2%)       |                |                |        |
| Max Systolic Blood Pressure within Last 24 Hours   |               | 141.5 (21.19) | 141.15 (20.53) | 141.66 (21.42) | 0.6365 |
|                                                    | Missing       | 32 (2%)       |                |                |        |
| Min Diastolic Blood Pressure within First 24 Hours |               | 58.43 (10.68) | 58.81 (11.15)  | 58.30 (10.53)  | 0.7304 |
|                                                    | Missing       | 89 (7%)       |                |                |        |
| Max Diastolic Blood Pressure within First 24 Hours |               | 81.48 (13.15) | 81.56 (14.27)  | 81.45 (12.76)  | 0.5855 |
|                                                    | Missing       | 89 (7%)       |                |                |        |
| Min Diastolic Blood Pressure within Last 24 Hours  |               | 61.47 (9.87)  | 60.87 (9.75)   | 61.67 (9.91)   | 0.2986 |
|                                                    | Missing       | 32 (2%)       |                |                |        |
| Max Diastolic Blood Pressure within Last 24 Hours  |               | 79.3 (11.61)  | 78.83 (10.87)  | 79.46 (11.45)  | 0.4696 |
|                                                    | Missing       | 32 (2%)       |                |                |        |

|                                            |         |               |                |                |        |
|--------------------------------------------|---------|---------------|----------------|----------------|--------|
| Min Pulse within First 24 Hours            |         | 75.98 (14.16) | 77.98 (16.01)  | 75.30 (13.42)  | 0.0384 |
|                                            | Missing | 87 (7%)       |                |                |        |
| Max Pulse within First 24 Hours            |         | 101.6 (18.18) | 102.49 (18.72) | 101.29 (17.99) | 0.3588 |
|                                            | Missing | 87 (7%)       |                |                |        |
| Min Pulse within Last 24 Hours             |         | 74.24 (12.87) | 75.75 (13.01)  | 73.74 (12.79)  | 0.0328 |
|                                            | Missing | 32 (2%)       |                |                |        |
| Max Pulse within Last 24 Hours             |         | 90.62 (15.13) | 92.41 (15.77)  | 90.02 (14.87)  | 0.0262 |
|                                            | Missing | 32 (2%)       |                |                |        |
| Min Temperature within First 24 Hours      |         | 96.95 (1.08)  | 96.98 (1.13)   | 96.94 (1.06)   | 0.6308 |
|                                            | Missing | 95 (7%)       |                |                |        |
| Max Temperature within First 24 hours      |         | 99.52 (1.62)  | 99.26 (1.50)   | 99.61 (1.65)   | 0.0015 |
|                                            | Missing | 95 (7%)       |                |                |        |
| Min Temperature within Last 24 hours       |         | 96.77 (0.89)  | 96.84 (0.92)   | 96.75 (0.88)   | 0.1457 |
|                                            | Missing | 35 (3%)       |                |                |        |
| Max Temperature within Last 24 hours       |         | 98.4 (0.85)   | 98.39 (0.79)   | 98.40 (0.86)   | 0.7343 |
|                                            | Missing | 35 (3%)       |                |                |        |
| Min Respiratory Rate within First 24 hours |         | 17.91 (2.20)  | 18.01 (2.33)   | 17.87 (2.16)   | 0.6219 |
|                                            | Missing | 92 (7%)       |                |                |        |
| Max Respiratory Rate within First 24 hours |         | 23.46 (6.75)  | 23.49 (7.52)   | 23.45 (6.47)   | 0.2379 |
|                                            | Missing | 92 (7%)       |                |                |        |
| Min Respiratory Rate within Last 24 hours  |         | 18.34 (1.66)  | 18.29 (1.69)   | 18.36 (1.65)   | 0.3614 |
|                                            | Missing | 33 (3%)       |                |                |        |
| Max Respiratory Rate within Last 24 hours  |         | 20.46 (3.83)  | 20.48 (3.37)   | 20.45 (3.97)   | 0.8912 |
|                                            | Missing | 33 (3%)       |                |                |        |
| Previous Pneumonia Vaccine                 |         |               |                |                |        |
|                                            | Yes     | 402 (31%)     | 101 (31%)      | 301 (32%)      | 0.8146 |
|                                            | No      | 878 (68%)     | 226 (69%)      | 652 (68%)      |        |
|                                            | Missing | 15 (1%)       |                |                |        |
| Min BUN within First 24 hours              |         | 21.04 (16.09) | 23.39 (17.91)  | 20.25 (15.35)  | 0.0039 |
|                                            | Missing | 46 (4%)       |                |                |        |
| Max BUN within First 24 hours              |         | 24.19 (17.81) | 26.79 (19.74)  | 23.31 (17.03)  | 0.0032 |
|                                            | Missing | 58 (4%)       |                |                |        |
| Min BUN within Last 24 hours               |         | 19.35 (15.00) | 20.98 (16.67)  | 18.79 (14.34)  | 0.0338 |
|                                            | Missing | 168 (13%)     |                |                |        |
| Max BUN within Last 24 hours               |         | 21.2 (16.47)  | 23.70 (18.32)  | 20.35 (15.71)  | 0.0012 |
|                                            | Missing | 168 (13%)     |                |                |        |
| Min Chloride within First 24 hours         |         | 99.68 (5.37)  | 99.54 (5.14)   | 99.72 (5.45)   | 0.3463 |
|                                            | Missing | 46 (4%)       |                |                |        |
| Max Chloride within First 24 hours         |         | 102 (5.27)    | 101.73 (5.34)  | 102.04 (5.25)  | 0.1574 |
|                                            | Missing | 46 (4%)       |                |                |        |
| Min Chloride within Last 24 hours          |         | 101.7 (5.08)  | 101.10 (5.68)  | 101.93 (4.84)  | 0.0471 |
|                                            | Missing | 171 (13%)     |                |                |        |
| Max Chloride within Last 24 hours          |         | 101.9 (5.10)  | 101.48 (5.74)  | 102.10 (4.86)  | 0.1513 |

|                                      |         |               |                 |                |         |
|--------------------------------------|---------|---------------|-----------------|----------------|---------|
|                                      | Missing | 171 (13%)     |                 |                |         |
| Min Sodium within First 24 hours     |         | 135.8 (4.63)  | 135.79 (4.80)   | 135.81 (4.58)  | 0.6908  |
|                                      | Missing | 116 (9%)      |                 |                |         |
| Max Sodium within First 24 hours     |         | 138 (4.36)    | 137.88 (4.25)   | 137.99 (4.40)  | 0.833   |
|                                      | Missing | 45 (3%)       |                 |                |         |
| Min Sodium within First 24 hours     |         | 138.1 (3.53)  | 137.51 (4.06)   | 138.26 (3.31)  | 0.0046  |
|                                      | Missing | 177 (14%)     |                 |                |         |
| Max Sodium within Last 24 hours      |         | 138.3 (3.55)  | 137.81 (4.10)   | 138.44 (3.33)  | 0.0192  |
|                                      | Missing | 45 (3%)       |                 |                |         |
| Min Potassium within First 24 hours  |         | 3.83 (0.57)   | 3.88 (0.58)     | 3.81 (0.56)    | 0.1082  |
|                                      | Missing | 45 (3%)       |                 |                |         |
| Max Potassium within First 24 hours  |         | 4.25 (0.77)   | 4.31 (0.77)     | 4.24 (0.76)    | 0.0902  |
|                                      | Missing | 50 (4%)       |                 |                |         |
| Min Potassium within Last 24 hours   |         | 4.04 (0.50)   | 4.05 (0.51)     | 4.04 (0.49)    | 0.7858  |
|                                      | Missing | 168 (13%)     |                 |                |         |
| Max Potassium within Last 24 hours   |         | 4.08 (0.52)   | 4.09 (0.52)     | 4.07 (0.52)    | 0.3521  |
|                                      | Missing | 170 (13%)     |                 |                |         |
| Min Glucose within First 24 hours    |         | 101.9 (32.86) | 98.53 (34.68)   | 103.05 (32.16) | 0.033   |
|                                      | Missing | 33 (3%)       |                 |                |         |
| Max Glucose within First 24 hours    |         | 169.3 (93.02) | 175.41 (104.86) | 167.25 (88.58) | 0.98    |
|                                      | Missing | 33 (3%)       |                 |                |         |
| Min Glucose within Last 24 hours     |         | 100.4 (31.68) | 101.42 (30.74)  | 100.06 (32.01) | 0.1435  |
|                                      | Missing | 117 (9%)      |                 |                |         |
| Max Glucose within Last 24 hours     |         | 153.3 (89.31) | 161.56 (89.80)  | 150.43 (89.01) | 0.0069  |
|                                      | Missing | 117 (9%)      |                 |                |         |
| Min Creatinine within First 24 hours |         | 1.47 (1.89)   | 1.54 (1.70)     | 1.44 (1.95)    | 0.01489 |
|                                      | Missing | 46 (4%)       |                 |                |         |
| Max Creatinine within First 24 hours |         | 1.66 (2.35)   | 1.72 (2.12)     | 1.64 (2.43)    | 0.3892  |
|                                      | Missing | 113 (9%)      |                 |                |         |
| Min Creatinine within Last 24 hours  |         | 1.48 (1.80)   | 1.55 (1.63)     | 1.46 (1.85)    | 0.1614  |
|                                      | Missing | 170 (13%)     |                 |                |         |
| Max Creatinine within Last 24 hours  |         | 1.40 (1.49)   | 1.52 (1.52)     | 1.36 (1.48)    | 0.174   |
|                                      | Missing | 190 (15%)     |                 |                |         |
| Min Hemoglobin within First 24 hours |         | 10.60 (2.05)  | 10.04 (1.93)    | 10.79 (2.05)   | <0.0001 |
|                                      | Missing | 76 (6%)       |                 |                |         |
| Max Hemoglobin within First 24 hours |         | 11.37 (2.04)  | 10.83 (1.87)    | 11.55 (2.06)   | <0.0001 |
|                                      | Missing | 76 (6%)       |                 |                |         |
| Min Hemoglobin within Last 24 hours  |         | 10.48 (1.85)  | 9.91 (1.62)     | 10.67 (1.89)   | <0.0001 |
|                                      | Missing | 187 (14%)     |                 |                |         |
| Max Hemoglobin within Last 24 hours  |         | 10.57 (1.84)  | 10.00 (1.63)    | 10.77 (1.87)   | <0.0001 |
|                                      | Missing | 187 (14%)     |                 |                |         |
| Min Albumin within First 24 hours    |         | 3.22 (0.58)   | 3.10 (0.58)     | 3.26 (0.57)    | 0.0002  |
|                                      | Missing | 296 (23%)     |                 |                |         |



|                                           |         |                   |               |                |         |
|-------------------------------------------|---------|-------------------|---------------|----------------|---------|
| Max Albumin within First 24 hours         |         | 3.39 (0.59)       | 3.25 (0.57)   | 3.43 (0.58)    | 0.0001  |
|                                           | Missing | 296 (23%)         |               |                |         |
| Min Albumin within Last 24 hours          |         | 3.11 (0.54)       | 3.00 (0.55)   | 3.15 (0.53)    | 0.0007  |
|                                           | Missing | 559 (43%)         |               |                |         |
| Max Albumin within Last 24 hours          |         | 3.13 (0.53)       | 3.03 (0.54)   | 3.17 (0.52)    | 0.001   |
|                                           | Missing | 559 (43%)         |               |                |         |
| Min MCV within First 24 hours             |         | 89.17 (7.23)      | 89.61 (7.00)  | 89.03 (7.30)   | 0.2007  |
|                                           | Missing | 88 (7%)           |               |                |         |
| Max MCV within First 24 hours             |         | 89.95 (7.35)      | 90.39 (7.03)  | 89.80 (7.45)   | 0.2102  |
|                                           | Missing | 88 (7%)           |               |                |         |
| Min MCV within Last 24 hours              |         | 89.74 (6.97)      | 90.11 (6.58)  | 89.62 (7.10)   | 0.3676  |
|                                           | Missing | 189 (15%)         |               |                |         |
| Max MCV within Last 24 hours              |         | 89.88 (6.97)      | 90.25 (6.54)  | 89.75 (7.11)   | 0.3243  |
|                                           | Missing | 189 (15%)         |               |                |         |
| Min INR within First 24 hours             |         | 1.32 (0.75)       | 1.42 (0.85)   | 1.28 (0.71)    | <0.0001 |
|                                           | Missing | 403 (31%)         |               |                |         |
| Max INR within First 24 hours             |         | 1.38 (0.88)       | 1.48 (0.94)   | 1.35 (0.86)    | <0.0001 |
|                                           | Missing | 403 (31%)         |               |                |         |
| Min INR within Last 24 hours              |         | 1.38 (0.66)       | 1.45 (0.63)   | 1.34 (0.68)    | 0.0001  |
|                                           | Missing | 760 (59%)         |               |                |         |
| Max INR within Last 24 hours              |         | 1.38 (0.68)       | 1.46 (0.63)   | 1.35 (0.69)    | 0.0001  |
|                                           | Missing | 760 (59%)         |               |                |         |
| Min ALT within First 24 hours             |         | 33.93<br>(124.79) | 26.21 (22.34) | 36.49 (143.38) | 0.5241  |
|                                           | Missing | 300 (23%)         |               |                |         |
| Max ALT within First 24 hours             |         | 38.42<br>(163.18) | 29.17 (27.00) | 41.49 (187.62) | 0.4336  |
|                                           | Missing | 300 (23%)         |               |                |         |
| Min ALT within Last 24 hours              |         | 35.89 (52.13)     | 33.89 (36.82) | 36.57 (56.45)  | 0.519   |
|                                           | Missing | 572 (44%)         |               |                |         |
| Max ALT within Last 24 hours              |         | 36.2 (52.47)      | 34.05 (36.77) | 36.93 (56.89)  | 0.5244  |
|                                           | Missing | 572 (44%)         |               |                |         |
| Min AST within first 24 hours             |         | 40.96<br>(207.71) | 31.73 (40.86) | 44.02 (238.49) | 0.7161  |
|                                           | Missing | 299 (23%)         |               |                |         |
| Max AST within First 24 hours             |         | 49.01<br>(262.92) | 36.82 (52.74) | 53.05 (301.81) | 0.6354  |
|                                           | Missing | 299 (23%)         |               |                |         |
| Min AST within Last 24 hours              |         | 32.17 (37.58)     | 32.08 (38.04) | 32.20 (37.46)  | 0.9567  |
|                                           | Missing | 572 (44%)         |               |                |         |
| Max AST within Last 24 hours              |         | 35.56 (37.70)     | 32.31 (37.97) | 32.64 (37.64)  | 0.9027  |
|                                           | Missing | 572 (44%)         |               |                |         |
| Min Total Bilirubin within First 24 hours |         | 0.53 (0.56)       | 0.51 (0.43)   | 0.54 (0.60)    | 0.6029  |
|                                           | Missing | 299 (23%)         |               |                |         |

|                                              |              |               |              |         |
|----------------------------------------------|--------------|---------------|--------------|---------|
| Max Total Bilirubin within First 24 hours    | 0.69 (1.00)  | 0.64 (0.65)   | 0.71 (1.09)  | 0.5147  |
| Missing                                      | 299 (23%)    |               |              |         |
| Min Total Bilirubin within Last 24 hours     | 0.50 (0.79)  | 0.50 (0.46)   | 0.50 (0.88)  | 0.6527  |
| Missing                                      | 571 (44%)    |               |              |         |
| Max Total Bilirubin within Last 24 hours     | 0.51 (0.80)  | 0.51 (0.46)   | 0.52 (0.88)  | 0.5064  |
| Missing                                      | 571 (44%)    |               |              |         |
| Allergies to Antibiotics                     |              |               |              |         |
| Penicillin                                   | 227 (18%)    | 61 (19%)      | 166 (17%)    | 0.1539  |
| Other                                        | 83 (6%)      | 28 (8%)       | 55 (6%)      |         |
| None                                         | 985 (76%)    | 241 (73%)     | 744 (77%)    |         |
| Missing                                      | 0 (0%)       |               |              |         |
| All Prior Admissions                         | 8.94 (14.10) | 13.11 (20.01) | 7.51 (11.05) | <0.0001 |
| Missing                                      | 0 (0%)       |               |              |         |
| Number of Admissions within One Year Prior   | 3.01 (4.31)  | 4.76 (5.37)   | 2.41 (3.70)  | <0.0001 |
| Missing                                      | 0 (0%)       |               |              |         |
| Number of Admissions within Six Months Prior | 1.84 (2.89)  | 2.96 (3.12)   | 1.46 (2.70)  | <0.0001 |
| Missing                                      | 0 (0%)       |               |              |         |

DPP4: Dipeptidyl peptidase-4 Inhibitor

COPD: Chronic Obstructive Pulmonary Disease

O<sub>2</sub>: Oxygen

FiO<sub>2</sub>: Fraction of inspired oxygen

BUN: Blood urea nitrogen

MCV: Mean corpuscular volume

INR: International normalized ratio of prothrombin time

ALT: Alanine transaminase

AST: Aspartate transaminase
